# Supplementary material for: Surface modification of layered zirconium phosphate with PNIPAM
Source: Royal Society of Chemistry journal article supplement (doi:10.1039/c6cc00174b), 2016-01-01
Supplement: c6cc00174b1.pdf [file c6cc00174b1.pdf]

## Surface Modification of Layered Zirconium Phosphate with PNIPAM

Xuezhen Wang<sup>ab</sup>, Di Zhao<sup>c</sup>, Ilse B. Nava Medina<sup>d</sup>, Agustin Diaz<sup>e</sup>, Huiliang Wang<sup>c</sup>, Abraham Clearfield<sup>e</sup>, M. Sam Manan<sup>abd</sup>, Zhengdong Cheng<sup>abd</sup>

### 1 SEM image of ZrP-PNIPAM

The scanning electron microscopy (SEM) image of ZrP-PNIPAM were shown in Fig. S1. The sample were freezing dried after preparation, and was observed using FEI Quanta 600 FE-SEM. Individual particle could be found, but the edge were not as clear as we obtained before<sup>1</sup>, we believe that was due to the PNIPAM polymer on the surface.

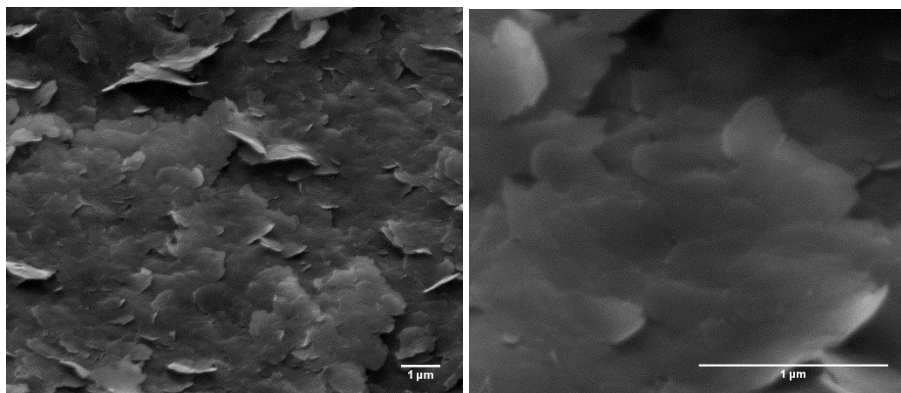

Fig S1. SEM image of ZrP-PNIPAM

### 2. Size difference of ZrP and ZrP-PNIPAM

Dynamic light scattering (DLS) had been used to measure the size of ZrP and ZrP-PNIPAM. The pristine ZrP had a size of  $295 \pm 134$  nm, after grafting PNIPAM, the particle size grew to be  $531 \pm 200$  nm. There were significant size growth after attaching PNIPAM, and the PNIPAM layer was then estimated to be around 118 nm.

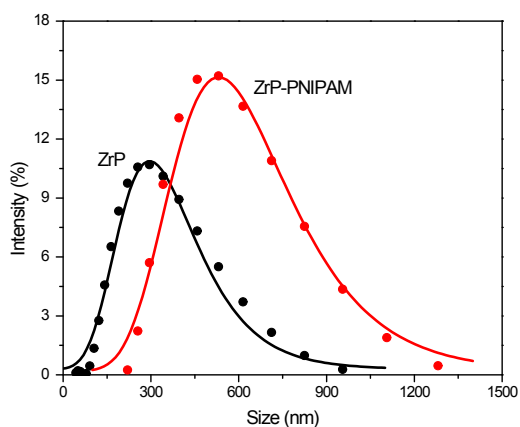

Fig S2. Size of ZrP and ZrP-PNIPAM measured by DLS

### References

- 1 M. Shuai, A. F. Mejia, Y.-W. Chang and Z. Cheng, *CrystEngComm*, 2013, **15**, 1970-1977.
